# Supplementary material for: Shrinkage of Genome Size in a Plant RNA Virus upon Transfer of an Essential Viral Gene into the Host Genome
Source: PubMed Central journal article supplement — Genome Biol Evol. 2014 Feb 20;6(3):538–50. doi: 10.1093/gbe/evu036 (PMC3971587; doi:10.1093/gbe/evu036), 2014-02-20
Supplement: supp_evu036_Tromas_et_al_GBE_v1_Supplementary_Material.pdf [file supp_evu036_Tromas_et_al_GBE_v1_Supplementary_Material.pdf]

Supplementary Material online for: “**Shrinkage of Genome Size in a Plant RNA Virus upon Transfer of an Essential Viral Gene into the Host Genome**” by Nicolas Tromas, Mark P. Zwart, Javier Forment and Santiago F. Elena.

**Table S1. RT-PCR primers**

| <b>Primers</b>    | <b>TEV genome position (5')</b> | <b>Sequence (5' to 3')</b>                |
|-------------------|---------------------------------|-------------------------------------------|
| 45-48-F           | 3542                            | TTGACGCTGAGCGGAGTGATGG                    |
| 73-80-F           | 6377                            | TCATTACAAACAAGCACTTG                      |
| 40-45-R           | 3877                            | ATCCAACAGCACCTCTCAC                       |
| 67-77-R           | 6664                            | AATGCTTCCAGAATATGCC                       |
| 92-96-R           | 8762                            | GCAAACCTGCTCATGTGTGG                      |
| 97-101-R          | 9473                            | CGCACTACATAGGAGAATTAG                     |
| TEV-CP-qPCR-F     | 9206                            | TTGGTCTTGATGGCAACGTG                      |
| TEV-CP-qPCR-R     | 9236                            | TGTGCCGTTCAAGTGTCTTCCT                    |
| TEV-NIa-Pro/NIb-F |                                 | AGCCAGTTAAGGAAGCGACT                      |
| TEV-NIa-Pro/NIb-R |                                 | TCAAGTTCCTGACAGTGCT                       |
| $\Delta$ NIb-F    | 6940                            | TTGCGAGTACACCAATTCATGAGTTGAGTCGCTTCCTT    |
| $\Delta$ NIb-R    | 8518                            | AGTGGCACTGTGGGTGCTGGTGTGACGCTGGTAAGAAGAAA |
